# Supplementary material for: Tunable luminescence based on structural regulation in organic antimony halides for X-ray scintillation
Source: Royal Society of Chemistry journal article supplement (doi:10.1039/d4qi01194e), 2024-01-01
Supplement: d4qi01194e1.pdf [file d4qi01194e1.pdf]

## Supporting Information

# **Tunable luminescence based on structural regulation in Organic Antimony Halides for X-ray Scintillation**

Sijun Cao <sup>a</sup>, Yijia Wang <sup>a</sup>, Jun'an Lai <sup>a\*</sup>, Kang An <sup>b</sup>, Mengyue Wu <sup>c</sup>, Peng Feng <sup>a</sup>, Peng He <sup>a\*</sup>  
and Xiaosheng Tang <sup>c\*</sup>

<sup>a</sup> Key Laboratory of Optoelectronic Technology & Systems (Ministry of Education), College of Optoelectronic Engineering, Chongqing University, Chongqing 400044, China

<sup>b</sup> ICT NDT Engineering Research Center, Ministry of Education, Chongqing University, Chongqing 400044, China.

<sup>c</sup> College of Optoelectronic Engineering, Chongqing University of Posts and Telecommunications, Chongqing, 400065, China

\* Corresponding author

E-mail: ja.lai@cqu.edu.cn (J. Lai), penghe@cqu.edu.cn (P. He), xstang@cqu.edu.cn (X. Tang).

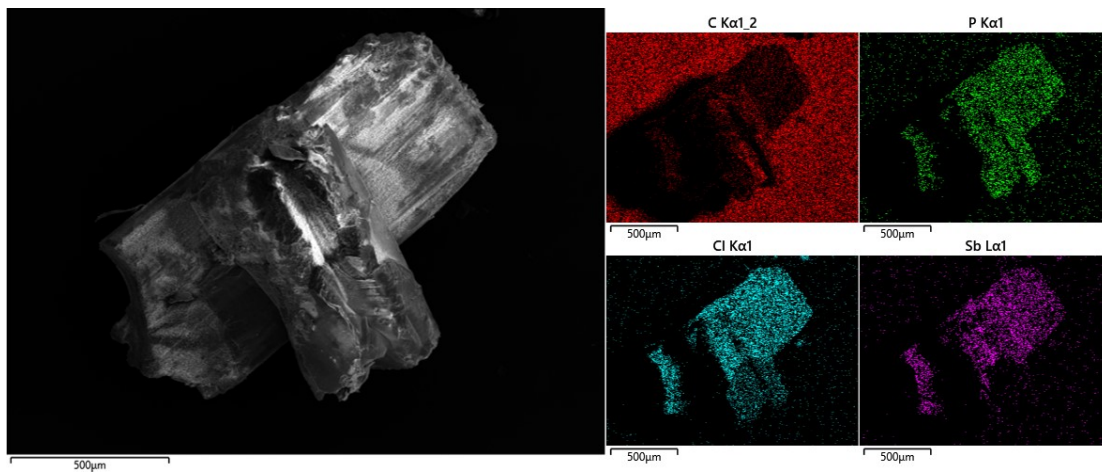

**Fig.S1** Scanning electron microscope images of (NYP)<sub>2</sub>SbCl<sub>5</sub> crystals. EDS mapping images of carbon, phosphorus, chlorine and antimony.

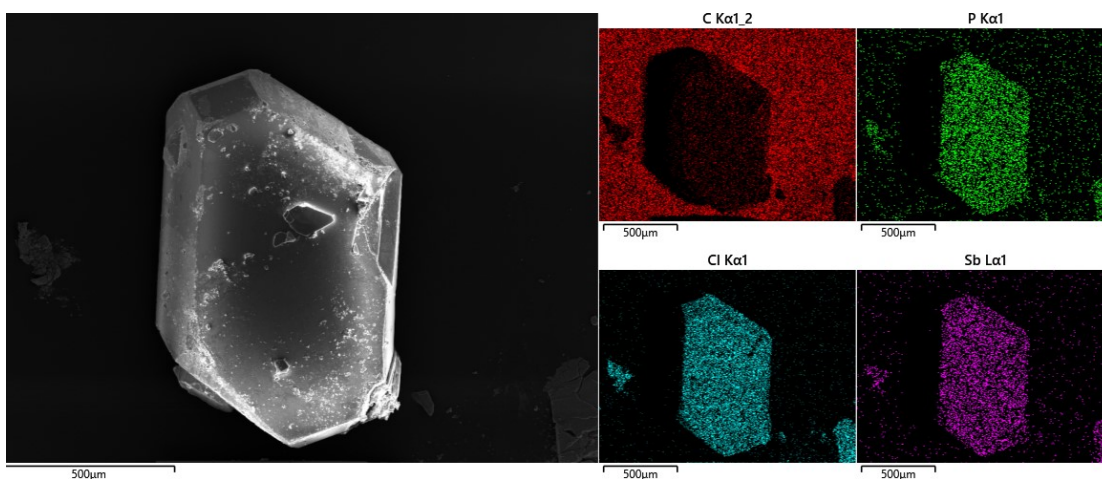

**Fig.S2** Scanning electron microscope images of (NYP)<sub>2</sub>Sb<sub>2</sub>Cl<sub>8</sub> crystals. EDS mapping images of carbon, phosphorus, chlorine and antimony.

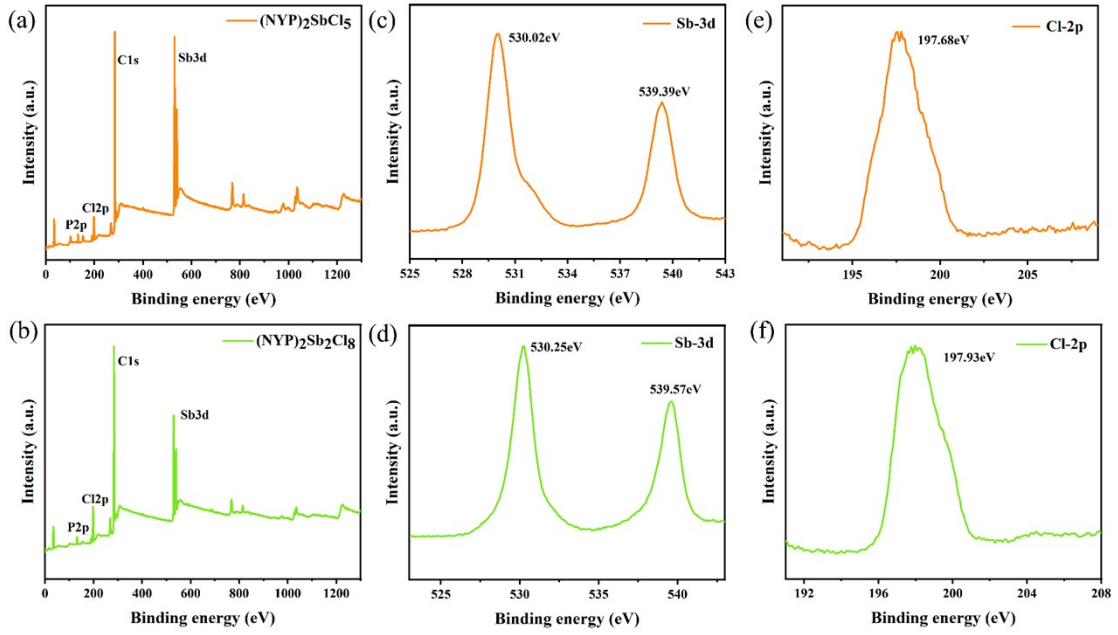

**Fig.S3** The XPS spectra of (a, b) all-scan, (c, d) Sb-3d, (e, f) Cl-2p.

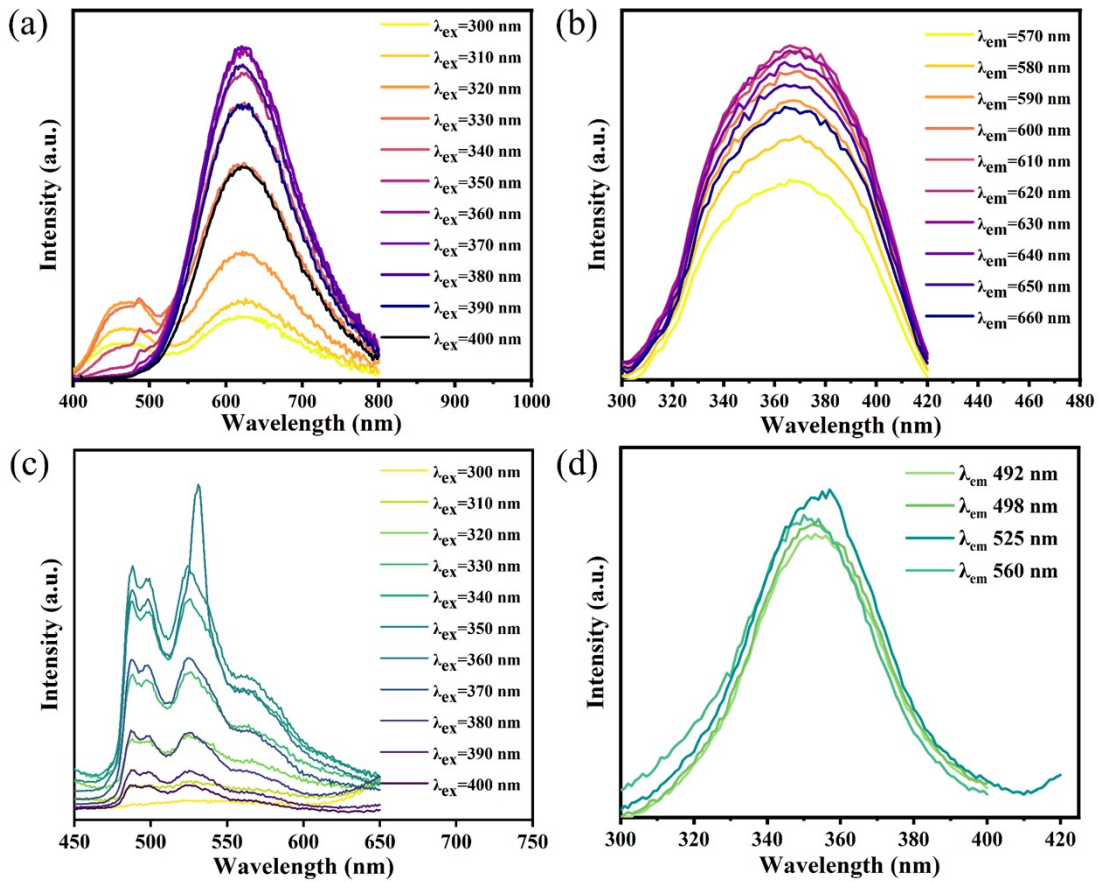

**Fig.S4** Emission spectra (a) and excitation spectra (b) of  $(\text{NYP})_2\text{SbCl}_5$  at different excitation wavelengths. Emission spectra (c) and Excitation spectra (d) of  $(\text{NYP})_2\text{Sb}_2\text{Cl}_8$  at different excitation wavelengths.

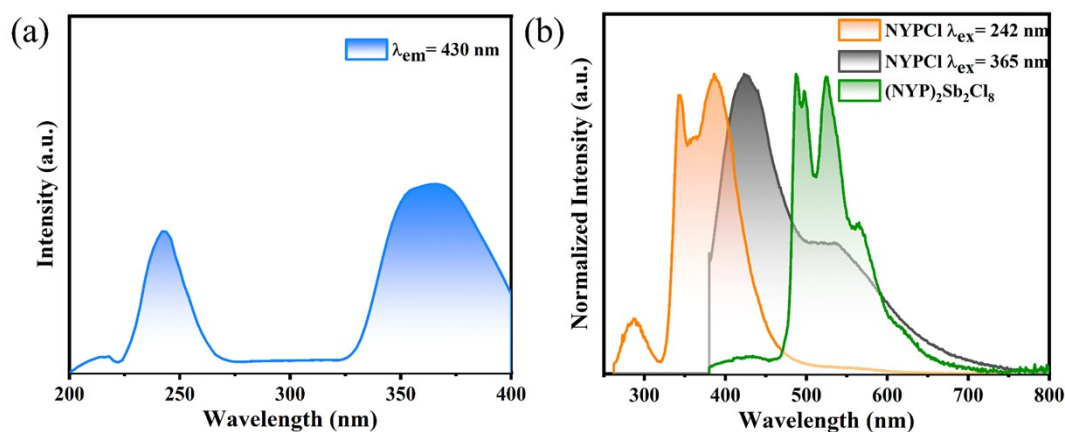

**Fig.S5** (a) The PL excitation spectrum of NYPCl with an emission wavelength of 430 nm. (b) The PL spectrums of NYPCl (Excitation wavelengths of 242 and 365 nm) and  $(\text{NYP})_2\text{Sb}_2\text{Cl}_8$ .

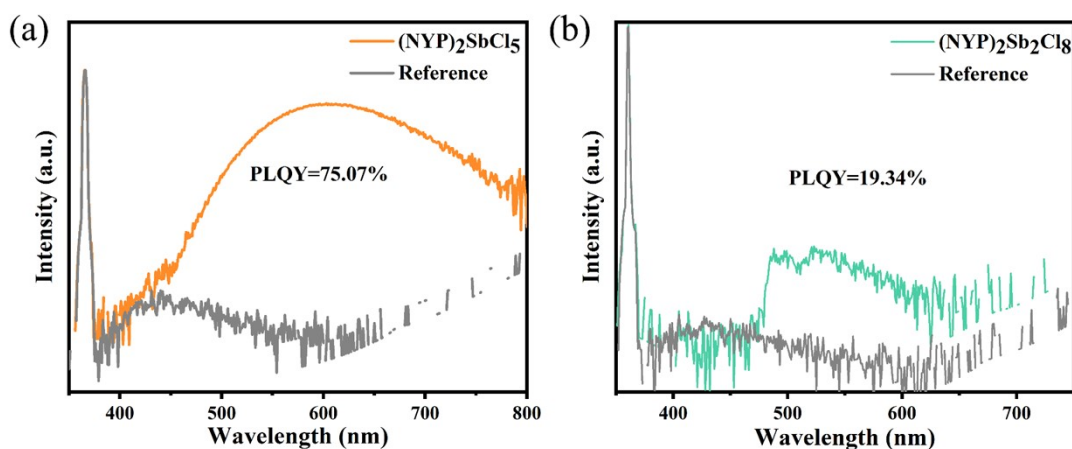

**Fig.S6** The PLQY of (a)  $(\text{NYP})_2\text{SbCl}_5$  ( $\lambda_{\text{ex}} = 365 \text{ nm}$ ) and (b)  $(\text{NYP})_2\text{Sb}_2\text{Cl}_8$  ( $\lambda_{\text{ex}} = 355 \text{ nm}$ ).

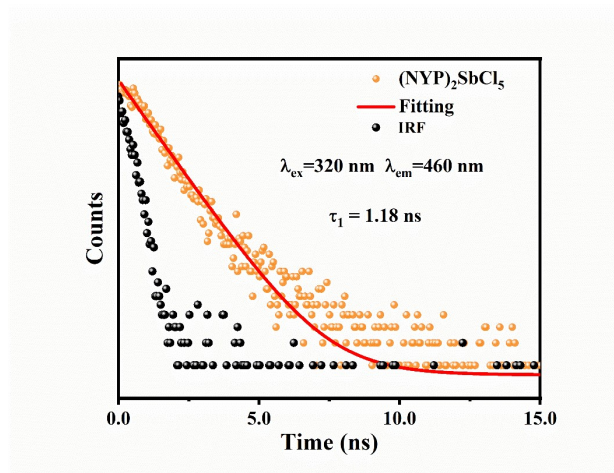

**Fig.S7** The time decay curves of  $(\text{NYP})_2\text{SbCl}_5$  at 320 nm excitation, 460 nm emission.

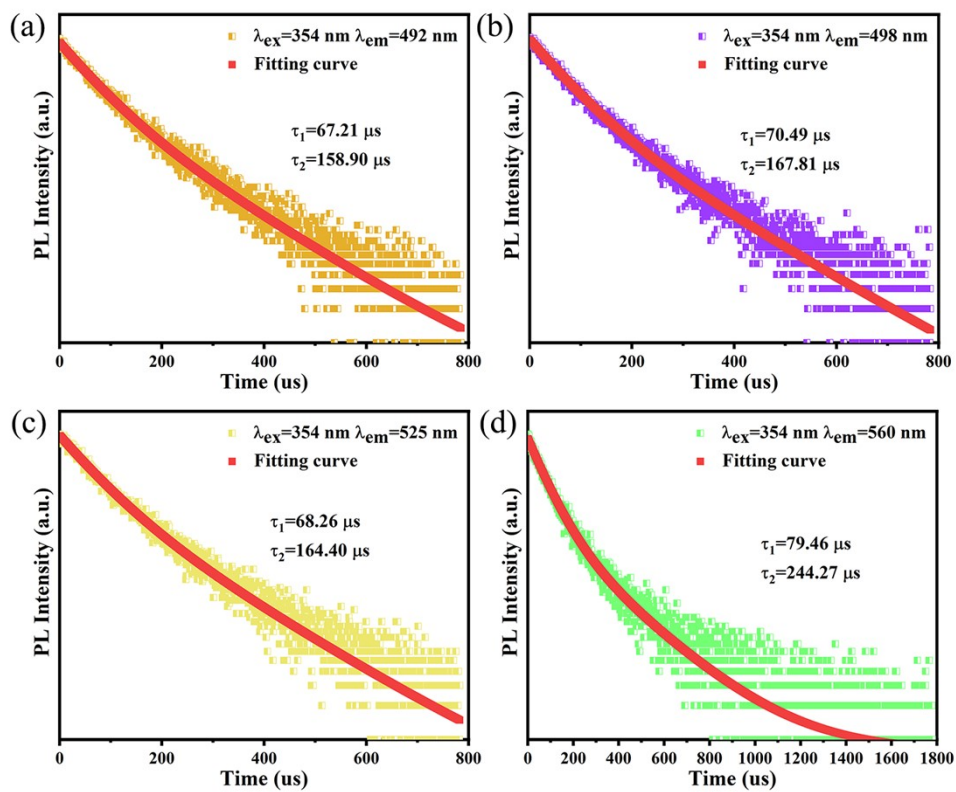

**Fig.S8** (a-d) The time decay curves of  $(\text{NYP})_2\text{Sb}_2\text{Cl}_8$  at 354 nm excitation with different emissions.



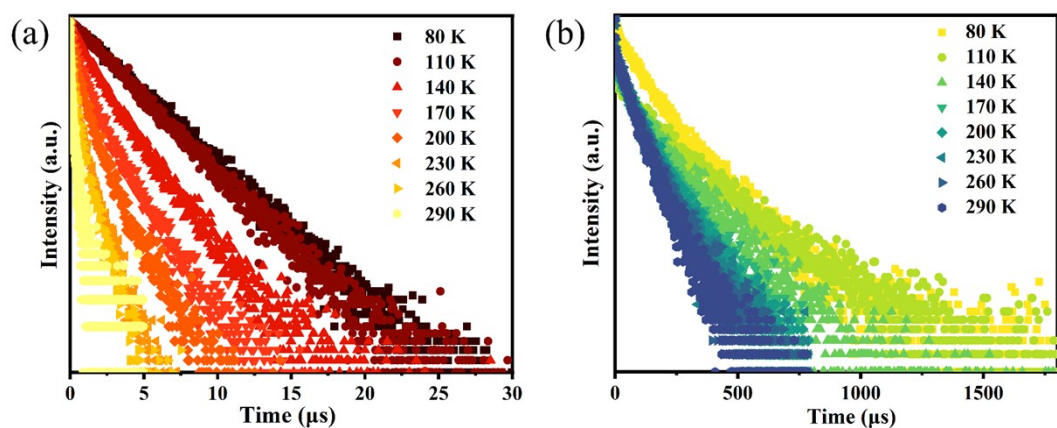

**Fig.S9** Temperature-dependent decay curves of (a)  $(\text{NYP})_2\text{SbCl}_5$  and (b)  $(\text{NYP})_2\text{Sb}_2\text{Cl}_8$  from 80 to 290 K.

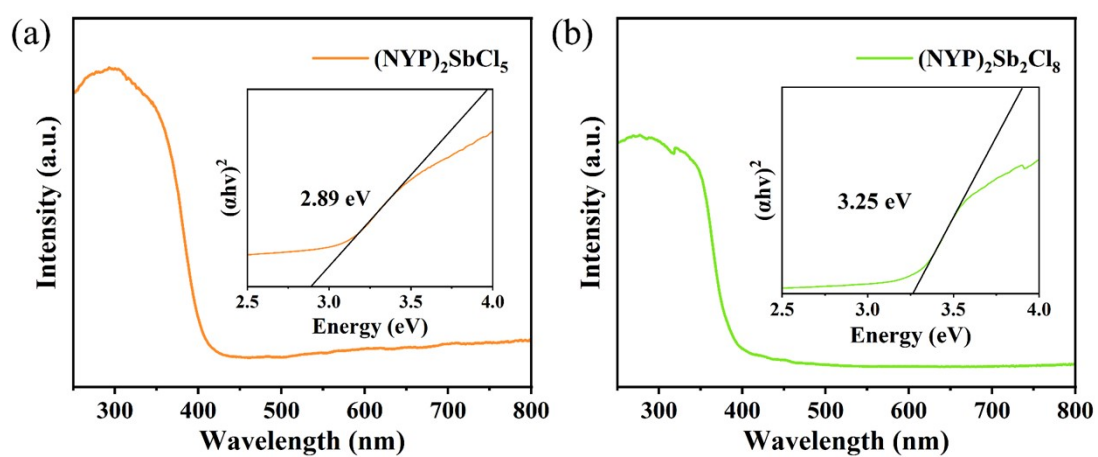

**Fig.S10** The Absorption spectra of  $(\text{NYP})_2\text{SbCl}_5$  and  $(\text{NYP})_2\text{Sb}_2\text{Cl}_8$ .

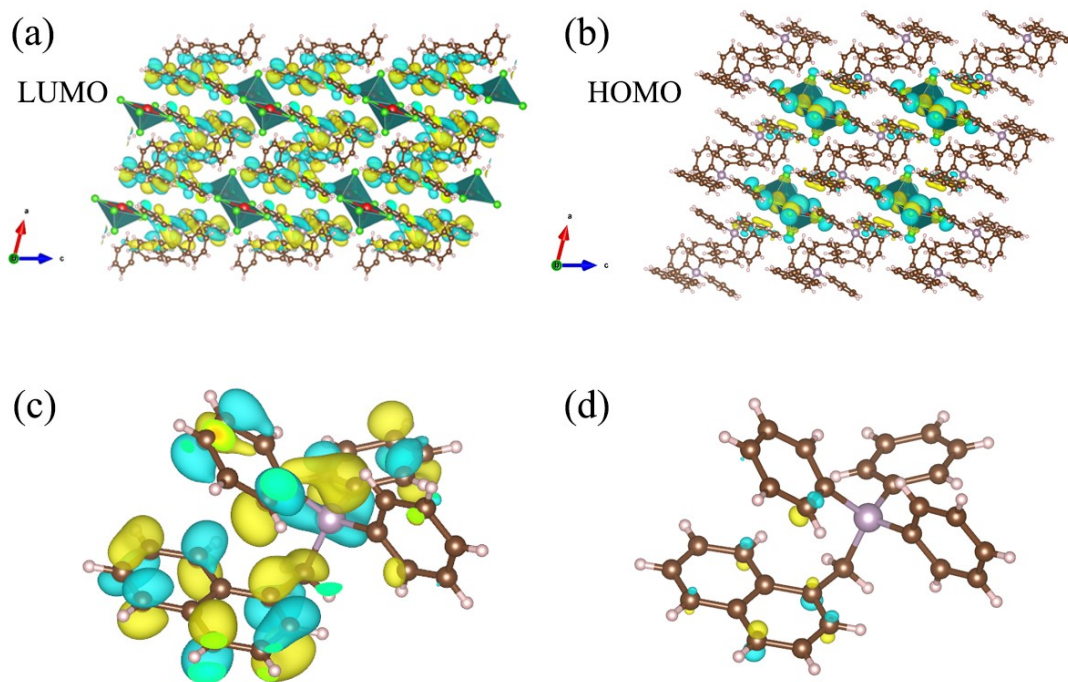

**Fig.S11** Isosurface plots of charge density corresponding to (a) LUMO and (b) HOMO of  $(\text{NYP})_2\text{Sb}_2\text{Cl}_8$ . Charge distribution maps of NYP at (c) low and (d) high isosurface levels.

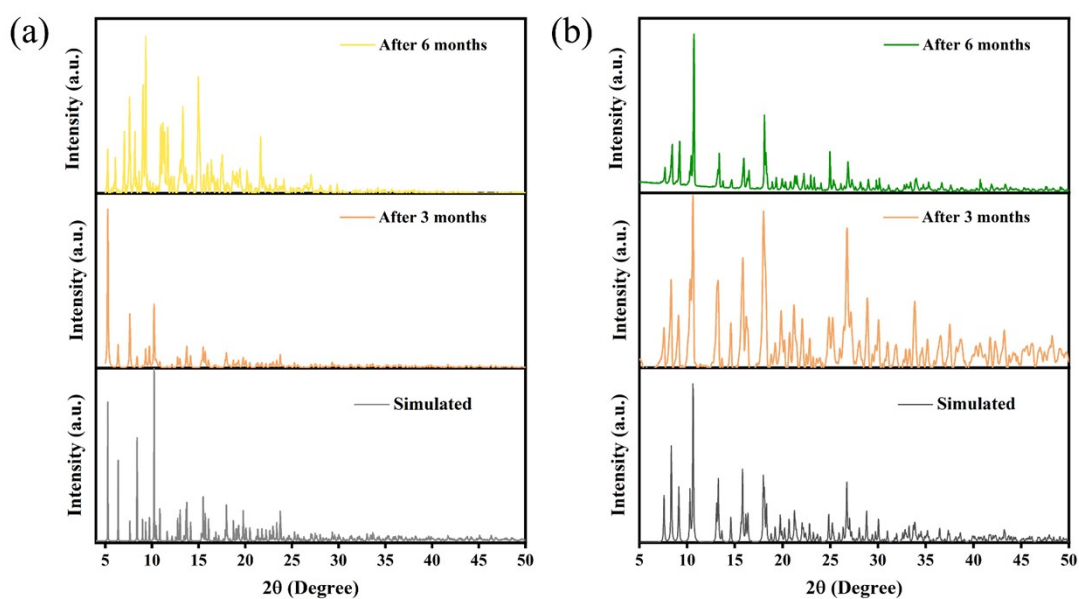

**Fig.S12** The PXRD spectra of (a)  $(\text{NYP})_2\text{SbCl}_5$  and (b)  $(\text{NYP})_2\text{Sb}_2\text{Cl}_8$  after

3 and 6 months of storage in ambient atmosphere.

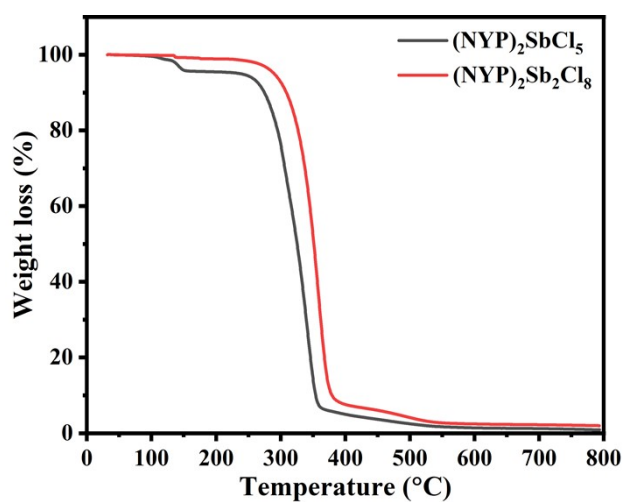

**Fig.S13** The thermogravimetry analysis of  $(\text{NYP})_2\text{SbCl}_5$  and  $(\text{NYP})_2\text{Sb}_2\text{Cl}_8$ .

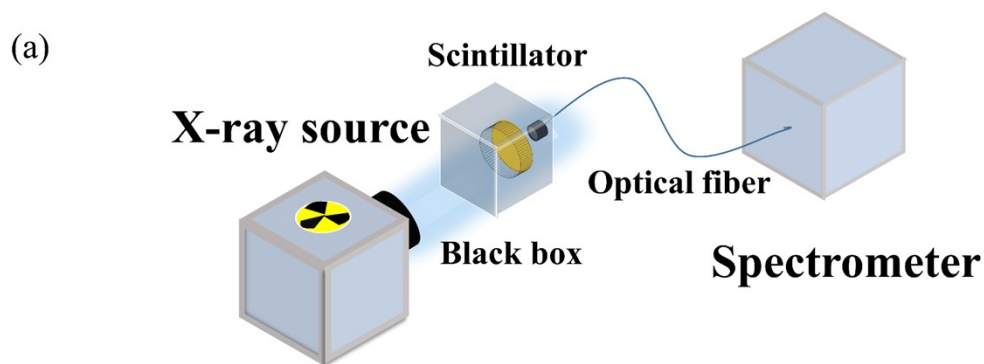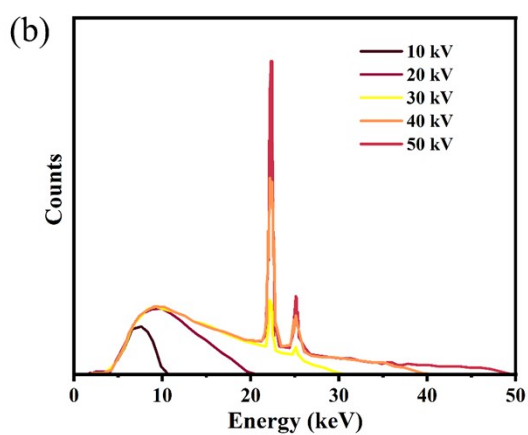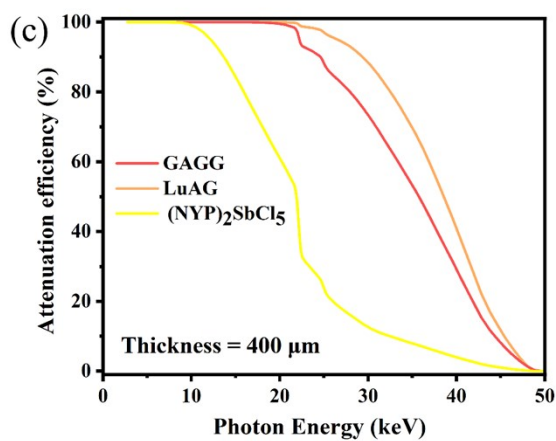



**Fig.S14** (a) Schematic of the RL intensity measurement testing system. (b) Output spectra at different tube voltages of Mini-X X-ray tube (target: Ag, the characteristic peak is at 22 keV). (c) Calculated X-ray attenuation efficiency spectra of GAGG, LuAG, and  $(\text{NYP})_2\text{SbCl}_5$  at the thickness of 400  $\mu\text{m}$ .

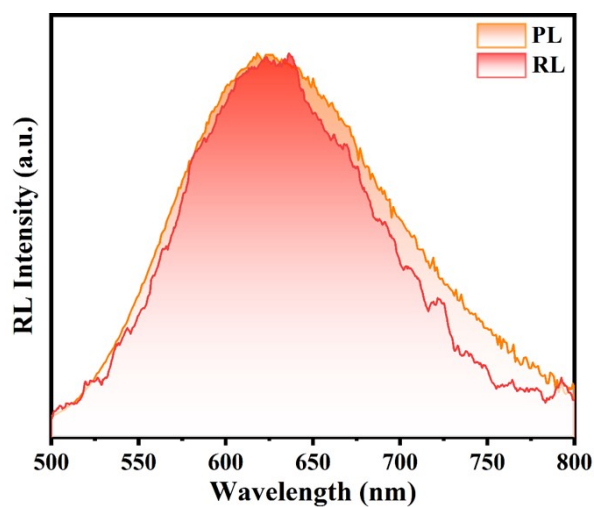

**Fig.S15** The PL and RL of  $(\text{NYP})_2\text{SbCl}_5$ .

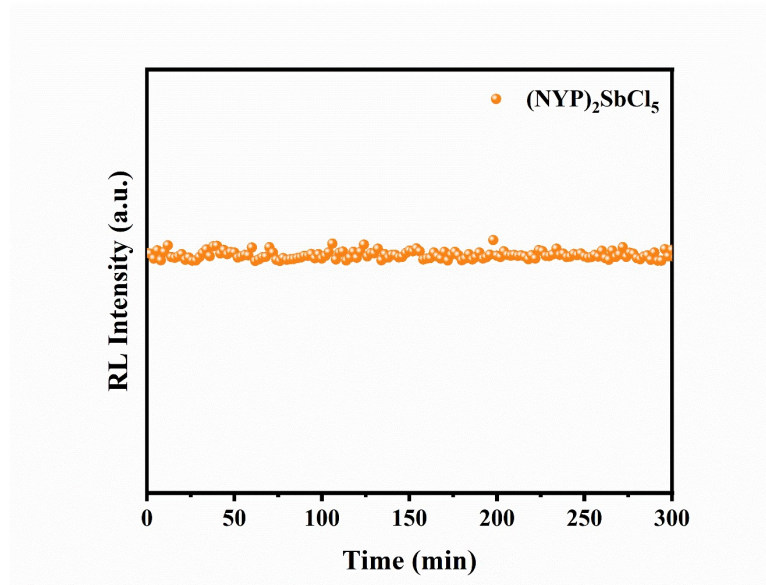

**Fig.S16** The radiation stability of  $(\text{NYP})_2\text{SbCl}_5$ .

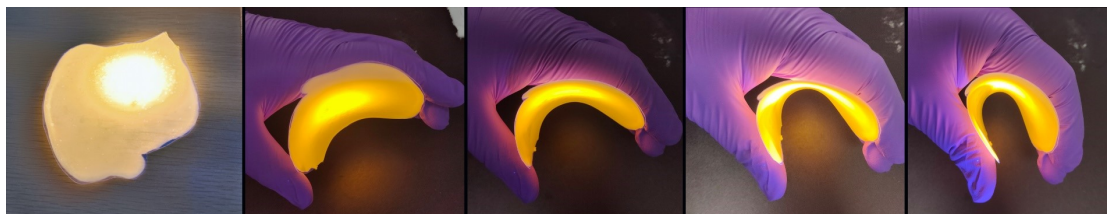

**Fig.S17** The UV-emitting pictures of scintillating screens at different bending angles.

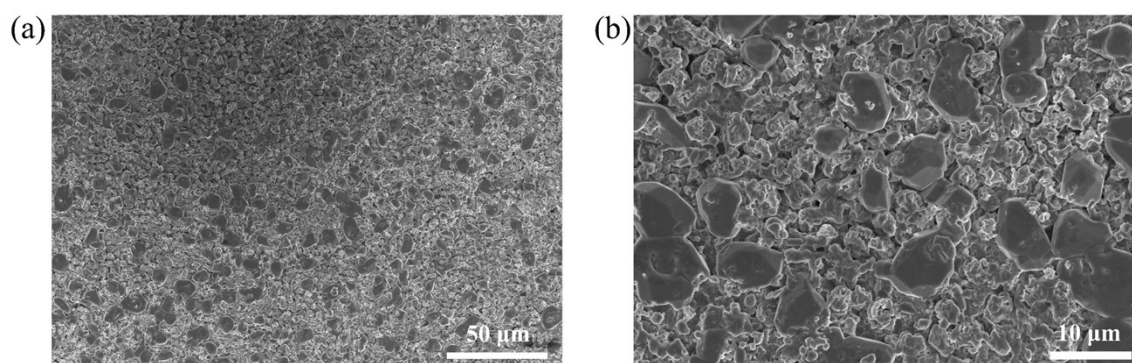

**Fig.S18** (a) SEM and (a) detailed images of the scintillating film based on  $(\text{NYP})_2\text{SbCl}_5$ .

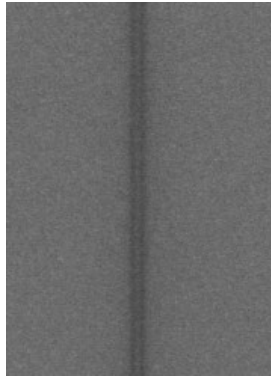

**Fig.S19** The imaging picture of the D12 (7.7 lp/mm) line pair extracted from the line pair card.

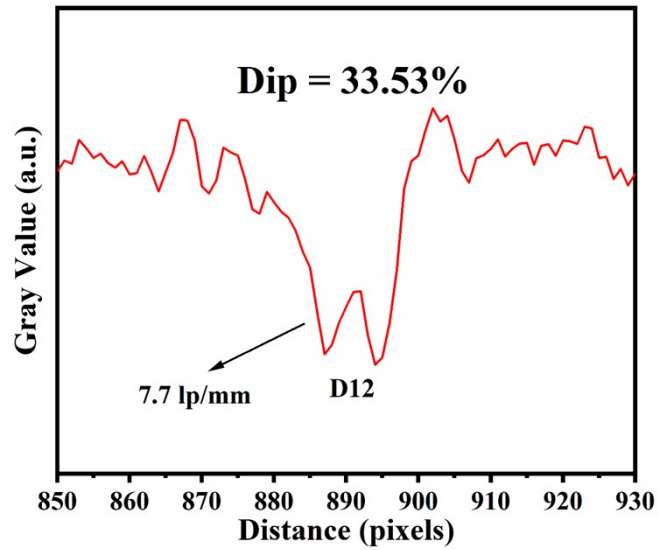

**Fig.S20** Gray value profiles of the line pair D12 (7.7 lp/mm) extracted from the line pair card.

**Table S1.** Crystal data and structure refinement for (NYP)<sub>2</sub>SbCl<sub>5</sub>.

|                                   |                                                                                                |
|-----------------------------------|------------------------------------------------------------------------------------------------|
| Empirical formula                 | C58 H48 Cl5 P2 Sb                                                                              |
| Formula weight                    | 1105.90                                                                                        |
| Temperature                       | 296.15 K                                                                                       |
| Wavelength                        | 0.71073 Å                                                                                      |
| Crystal system                    | Orthorhombic                                                                                   |
| Space group                       | P21                                                                                            |
| Unit cell dimensions              | a = 10.0922(19) Å    a = 90 °.<br>b = 21.053(4) Å    b = 90 °.<br>c = 27.752(6) Å    g = 90 °. |
| Volume                            | 5896(2) Å <sup>3</sup>                                                                         |
| Z                                 | 4                                                                                              |
| Density (calculated)              | 1.246 g/cm <sup>3</sup>                                                                        |
| Absorption coefficient            | 0.782 mm <sup>-1</sup>                                                                         |
| F(000)                            | 2248.0                                                                                         |
| Theta range for data collection   | 2.542 to 25.019°.                                                                              |
| Index ranges                      | -12<=h<=12,    -25<=k<=21,    -<br>32<=l<=32                                                   |
| Reflections collected             | 92143                                                                                          |
| Independent reflections           | 10367 [R(int) = 0.1035]                                                                        |
| Completeness to theta = 25.115°   | 99.8 %                                                                                         |
| Data / restraints / parameters    | 10367 / 1193 / 782                                                                             |
| Goodness-of-fit on F <sup>2</sup> | 1.040                                                                                          |
| Final R indices [I>2sigma(I)]     | R1 = 0.0542, wR2 = 0.1094                                                                      |
| R indices (all data)              | R1 = 0.1082, wR2 = 0.1294                                                                      |
| Largest diff. peak and hole       | 0.613 and -0.375 e.Å <sup>-3</sup>                                                             |

**Table S2. Bond Lengths for (NYP)<sub>2</sub>SbCl<sub>5</sub>.**

| Atom          | Length/Å  | Atom          | Length/Å  | Atom          | Length/Å  | Atom          | Length/Å |
|---------------|-----------|---------------|-----------|---------------|-----------|---------------|----------|
| Sb(01)-Cl(03) | 2.629(3)  | C(015)-H(015) | 0.93      | C(01B)-H(01B) | 0.93      | C(15A)-H(15A) | 0.93     |
| Sb(01)-Cl(04) | 2.631(3)  | C(015)-C(01F) | 1.39      | C(01C)-H(01E) | 0.93      | C(15A)-C(14A) | 1.39     |
| Sb(01)-Cl(05) | 2.368(3)  | C(01F)-H(01F) | 0.93      | C(01C)-C(01R) | 1.34(3)   | C(14A)-H(14A) | 0.93     |
| Sb(01)-Cl(06) | 2.585(3)  | C(01F)-C(01L) | 1.39      | C(01H)-H(01A) | 0.97      | C(14A)-C(13A) | 1.39     |
| Sb(01)-Cl(07) | 2.592(3)  | C(01L)-H(01L) | 0.93      | C(01H)-H(01C) | 0.97      | C(13A)-H(13A) | 0.93     |
| P(002)-C(009) | 1.781(10) | C(01L)-C(01I) | 1.39      | C(01H)-C(1B)  | 1.57(3)   | C(13A)-C(10A) | 1.39     |
| P(002)-C(00H) | 1.783(11) | C(01I)-C(01A) | 1.39      | C(01R)-H(01R) | 0.93      | C(10A)-H(10A) | 0.93     |
| P(002)-C(00J) | 1.819(9)  | C(01I)-C(01C) | 1.47(3)   | C(01R)-C(39)  | 1.29(3)   | C(10A)-C(01E) | 1.39     |
| P(002)-C(00U) | 1.790(10) | C(01A)-C(00W) | 1.45(4)   | C(1)-H(1)     | 0.93      | C(01E)-H(01H) | 0.93     |
| P(008)-C(00Q) | 1.705(18) | C(00P)-H(00P) | 0.93      | C(2)-H(2)     | 0.93      | C(0)-H(0)     | 0.93     |
| P(008)-C(01H) | 1.81(2)   | C(00P)-C(010) | 1.343(14) | C(2)-C(3)     | 1.39      | C(0)-C(17)    | 1.44(3)  |
| P(008)-C(00V) | 1.768(13) | C(00Q)-C(01M) | 1.39      | C(2)-C(00V)   | 1.39      | C(11)-H(11)   | 0.93     |
| P(008)-C(16)  | 1.813(14) | C(00Q)-C(018) | 1.39      | C(3)-H(3)     | 0.93      | C(11)-C(18)   | 1.33(3)  |
| C(009)-C(00F) | 1.405(14) | C(01M)-H(01M) | 0.93      | C(3)-C(01N)   | 1.39      | C(12)-H(12)   | 0.93     |
| C(009)-C(1)   | 1.409(14) | C(01M)-C(013) | 1.39      | C(01N)-H(01N) | 0.93      | C(12)-C(19)   | 1.39     |
| C(00A)-C(00B) | 1.441(14) | C(013)-H(013) | 0.93      | C(01N)-C(4)   | 1.39      | C(12)-C(1A)   | 1.39     |
| C(00A)-C(00I) | 1.405(16) | C(013)-C(00S) | 1.39      | C(4)-H(4)     | 0.93      | C(19)-H(19)   | 0.93     |
| C(00A)-C(00Y) | 1.385(15) | C(00S)-H(00S) | 0.93      | C(4)-C(5)     | 1.39      | C(19)-C(01G)  | 1.39     |
| C(00B)-C(00E) | 1.428(14) | C(00S)-C(019) | 1.39      | C(5)-H(5)     | 0.93      | C(01G)-H(01G) | 0.93     |
| C(00B)-C(00K) | 1.407(14) | C(019)-H(019) | 0.93      | C(5)-C(00V)   | 1.39      | C(01G)-C(1D)  | 1.39     |
| C(00D)-H(00D) | 0.93      | C(019)-C(018) | 1.39      | C(16)-C(15)   | 1.39      | C(1D)-H(1D)   | 0.93     |
| C(00D)-C(00E) | 1.366(14) | C(018)-H(018) | 0.93      | C(16)-C(01D)  | 1.39      | C(1D)-C(01J)  | 1.39     |
| C(00D)-C(00M) | 1.415(16) | C(00R)-H(00R) | 0.93      | C(15)-H(15)   | 0.93      | C(01J)-C(1A)  | 1.39     |
| C(00E)-C(00J) | 1.462(12) | C(00R)-C(00X) | 1.341(16) | C(15)-C(14)   | 1.39      | C(1A)-C(1B)   | 1.35(3)  |
| C(00F)-H(00F) | 0.93      | C(00T)-H(00T) | 0.93      | C(14)-H(14)   | 0.93      | C(2A)-H(2A)   | 0.93     |
| C(00F)-C(010) | 1.387(14) | C(00T)-C(016) | 1.380(16) | C(14)-C(13)   | 1.39      | C(2A)-C(3A)   | 1.39     |
| C(00G)-H(00G) | 0.93      | C(00U)-C(00Z) | 1.365(16) | C(13)-H(13)   | 0.93      | C(2A)-C(9)    | 1.39     |
| C(00G)-C(00P) | 1.381(15) | C(00U)-C(017) | 1.387(15) | C(13)-C(10)   | 1.39      | C(3A)-H(3A)   | 0.93     |
| C(00G)-C(1)   | 1.403(14) | C(00W)-H(00W) | 0.93      | C(10)-H(10)   | 0.93      | C(3A)-C(01O)  | 1.39     |
| C(00H)-C(00N) | 1.408(14) | C(00W)-C(39)  | 1.54(5)   | C(10)-C(01D)  | 1.39      | C(01O)-H(01O) | 0.93     |
| C(00H)-C(012) | 1.378(14) | C(00X)-H(00X) | 0.93      | C(01D)-H(01D) | 0.93      | C(01O)-C(4A)  | 1.39     |
| C(00I)-H(00I) | 0.93      | C(00X)-C(012) | 1.397(16) | C(39)-H(39)   | 0.93      | C(4A)-H(4A)   | 0.93     |
| C(00I)-C(00M) | 1.360(17) | C(00Y)-H(00Y) | 0.93      | C(6)-H(6)     | 0.93      | C(4A)-C(5A)   | 1.39     |
| C(00J)-H(00A) | 0.97      | C(00Y)-C(016) | 1.340(16) | C(6)-C(01J)   | 1.38(3)   | C(5A)-H(5A)   | 0.93     |
| C(00J)-H(00B) | 0.97      | C(00Z)-H(00Z) | 0.93      | C(6)-C(01S)   | 1.35(4)   | C(5A)-C(9)    | 1.39     |
| C(00K)-H(00K) | 0.93      | C(00Z)-C(011) | 1.418(15) | P(0)-C(7)     | 1.80(3)   | C(17)-H(17)   | 0.93     |
| C(00K)-C(00T) | 1.360(14) | C(010)-H(010) | 0.93      | P(0)-C(8)     | 1.81(2)   | C(17)-C(1C)   | 1.32(3)  |
| C(00L)-H(00L) | 0.93      | C(011)-H(011) | 0.93      | P(0)-C(16A)   | 1.761(14) | C(18)-H(18)   | 0.93     |
| C(00L)-C(00N) | 1.365(15) | C(011)-C(014) | 1.33(2)   | P(0)-C(9)     | 1.771(13) | C(18)-C(1C)   | 1.36(4)  |
| C(00L)-C(00R) | 1.371(16) | C(012)-H(012) | 0.93      | C(7)-C(0)     | 1.43(3)   | C(1B)-C(39A)  | 1.48(5)  |
| C(00M)-H(00M) | 0.93      | C(014)-H(014) | 0.93      | C(7)-C(11)    | 1.36(3)   | C(1C)-H(1C)   | 0.93     |



|               |         |               |           |               |      |               |         |
|---------------|---------|---------------|-----------|---------------|------|---------------|---------|
| C(00N)-H(00N) | 0.93    | C(014)-C(01B) | 1.38(2)   | C(8)-H(8A)    | 0.97 | C(39A)-H(39A) | 0.93    |
| C(00O)-C(015) | 1.39    | C(016)-H(016) | 0.93      | C(8)-H(8B)    | 0.97 | C(39A)-C(01S) | 1.29(4) |
| C(00O)-C(01A) | 1.39    | C(017)-H(017) | 0.93      | C(16A)-C(15A) | 1.39 | C(01S)-H(01S) | 0.93    |
| C(00O)-C(8)   | 1.46(2) | C(017)-C(01B) | 1.412(19) | C(16A)-C(01E) | 1.39 |               |         |

**Table S3.** Crystal data and structure refinement for (NYP)<sub>2</sub>Sb<sub>2</sub>Cl<sub>8</sub>.

|                                   |                                                                                                                            |
|-----------------------------------|----------------------------------------------------------------------------------------------------------------------------|
| Empirical formula                 | C <sub>29</sub> H <sub>24</sub> Cl <sub>4</sub> P Sb                                                                       |
| Formula weight                    | 667.00                                                                                                                     |
| Temperature                       | 300.00 K                                                                                                                   |
| Crystal system                    | triclinic                                                                                                                  |
| Space group                       | P <sub>1</sub>                                                                                                             |
| Unit cell dimensions              | a = 10.843(4) Å      a = 63.782(10) °.<br>b = 12.238(5) Å      b = 67.746(11) °.<br>c = 13.423(5) Å      g = 67.259(13) °. |
| Volume                            | 1426.5(10) Å <sup>3</sup>                                                                                                  |
| Z                                 | 2                                                                                                                          |
| Density (calculated)              | 1.553 g/cm <sup>3</sup>                                                                                                    |
| Absorption coefficient            | 7.970 mm <sup>-1</sup>                                                                                                     |
| F(000)                            | 664.0                                                                                                                      |
| Theta range for data collection   | 7.946 to 120.47°.                                                                                                          |
| Index ranges                      | -13 ≤ h ≤ 13,      -14 ≤ k ≤ 15,      -<br>17 ≤ l ≤ 16                                                                     |
| Reflections collected             | 16695                                                                                                                      |
| Independent reflections           | 6044 [R(int) = 0.0356, R(sigma) = 0.0368]                                                                                  |
| Completeness to theta = 25.115°   | 99.4 %                                                                                                                     |
| Data / restraints / parameters    | 6044 / 0 / 317                                                                                                             |
| Goodness-of-fit on F <sup>2</sup> | 1.135                                                                                                                      |
| Final R indices [I > 2σ(I)]       | R <sub>1</sub> = 0.0373, wR <sub>2</sub> = 0.0936                                                                          |
| R indices (all data)              | R <sub>1</sub> = 0.0463, wR <sub>2</sub> = 0.1053                                                                          |
| Largest diff. peak and hole       | 0.80 and -1.28 e.Å <sup>-3</sup>                                                                                           |

**Table S4.** Bond Lengths for (NYP)<sub>2</sub>Sb<sub>2</sub>Cl<sub>8</sub>.

| Atom | Atom | Length/Å   | Atom | Atom | Length/Å |
|------|------|------------|------|------|----------|
| Sb1  | C12  | 2.3804(15) | C7   | C12  | 1.400(6) |
| Sb1  | C13  | 2.4806(15) | C7   | C8   | 1.384(6) |
| Sb1  | C11  | 2.4471(15) | C14  | C15  | 1.394(6) |
| P1   | C1   | 1.805(4)   | C12  | C11  | 1.392(6) |
| P1   | C13  | 1.801(4)   | C4   | C3   | 1.382(7) |
| P1   | C19  | 1.825(4)   | C4   | C5   | 1.368(7) |
| P1   | C7   | 1.792(4)   | C28  | C27  | 1.371(6) |
| C1   | C2   | 1.395(6)   | C6   | C5   | 1.392(6) |
| C1   | C6   | 1.391(5)   | C9   | C8   | 1.390(6) |
| C13  | C18  | 1.402(6)   | C9   | C10  | 1.363(7) |
| C13  | C14  | 1.385(6)   | C24  | C23  | 1.423(8) |
| C20  | C29  | 1.421(5)   | C24  | C25  | 1.408(7) |
| C20  | C19  | 1.516(5)   | C10  | C11  | 1.380(7) |
| C20  | C21  | 1.375(6)   | C27  | C26  | 1.398(8) |
| C29  | C28  | 1.430(6)   | C22  | C23  | 1.354(8) |
| C29  | C24  | 1.427(6)   | C17  | C16  | 1.384(8) |
| C18  | C17  | 1.385(6)   | C15  | C16  | 1.365(8) |
| C21  | C22  | 1.412(7)   | C26  | C25  | 1.365(9) |
| C2   | C3   | 1.390(6)   |      |      |          |

**Table S5.** Summary of the PL properties of hybrid antimony chlorides with  $\text{SbCl}_5$  cluster.

| Compound                                                                      | Emission<br>(nm) | Decay<br>time<br>( $\mu\text{s}$ ) | PLQY<br>(%) | Sb-Sb<br>distance<br>( $\text{\AA}$ ) | Ref       |
|-------------------------------------------------------------------------------|------------------|------------------------------------|-------------|---------------------------------------|-----------|
| $(\text{PPN})_2\text{SbCl}_5$                                                 | 635              | 4.1                                | 98.1        | 12.19                                 | 1         |
| $(\text{Bmim})_2\text{SbCl}_5$                                                | 583              | 4.26                               | 86.3        | 9.02                                  | 2         |
| $(\text{TMA})_2\text{SbCl}_5 \cdot \text{DMF}$                                | 630              | 6.62                               | 67.2        | 8.61                                  | 3         |
| $(\text{C}_6\text{N}_2\text{H}_{16})_2\text{SbCl}_5$                          | 613              | 1.06                               | 25.3        | 3.99                                  | 4         |
| $(\text{C}_6\text{N}_2\text{H}_{16})_2\text{SbCl}_5 \cdot \text{H}_2\text{O}$ | 620              | 1.22                               | 39.6        | 4.34                                  | 4         |
| $(\text{NYP})_2\text{SbCl}_5$                                                 | 620              | 0.33                               | 75.07       | 10.09                                 | This work |

**Table S6** The parameter of ISO 19232 duplex-wire image quality indicator. DD: duplex wire numbers; UT: corresponding unsharpness; SRb: corresponding basic spatial resolution; d: wire diameter and spacing; LP: corresponding line pair value.

| DD  | UT (mm) | SRb (mm) | d (mm) | LP (lp/mm) |
|-----|---------|----------|--------|------------|
| D4  | 800     | 400      | 400    | 1.250      |
| D5  | 640     | 320      | 320    | 1.560      |
| D6  | 500     | 250      | 250    | 2.000      |
| D7  | 400     | 200      | 200    | 2.500      |
| D8  | 320     | 160      | 160    | 3.130      |
| D9  | 260     | 130      | 130    | 3.850      |
| D10 | 200     | 100      | 100    | 5.000      |
| D11 | 160     | 80       | 80     | 6.250      |
| D12 | 130     | 63       | 63     | 7.690      |
| D13 | 100     | 50       | 50     | 10.000     |
| D14 | 80      | 40       | 40     | 12.50      |
| D15 | 63      | 32       | 32     | 15.90      |
| D16 | 50      | 25       | 25     | 20.00      |
| D17 | 20      | 20       | 20     | 25.00      |

1. Q. He, C. Zhou, L. Xu, S. Lee, X. Lin, J. Neu, M. Worku, M. Chaaban and B. Ma, Highly Stable Organic Antimony Halide Crystals for X-ray Scintillation, *ACS Mater. Lett.*, 2020, **2**, 633-638.
2. Z.-P. Wang, J.-Y. Wang, J.-R. Li, M.-L. Feng, G.-D. Zou and X.-Y. Huang, [Bmim]<sub>2</sub>SbCl<sub>5</sub>: a main group metal-containing ionic liquid exhibiting tunable photoluminescence and white-light emission, *Chem. Commun.*, 2015, **51**, 3094-3097.
3. Q. Wei, T. Chang, R. Zeng, S. Cao, J. Zhao, X. Han, L. Wang and B. Zou, Self-Trapped Exciton Emission in a Zero-Dimensional (TMA)<sub>2</sub>SbCl<sub>5</sub>·DMF Single Crystal and Molecular Dynamics Simulation of Structural Stability, *The Journal of Physical Chemistry Letters*, 2021, **12**, 7091-7099.
4. G. Song, M. Li, S. Zhang, N. Wang, P. Gong, Z. Xia and Z. Lin, Enhancing Photoluminescence Quantum Yield in 0D Metal Halides by Introducing Water Molecules, *Adv. Funct. Mater.*, 2020, **30**, 2002468.
